# Supplementary material for: Nrg1β Released in Remote Ischemic Preconditioning Improves Myocardial Perfusion and Decreases Ischemia/Reperfusion Injury via ErbB2-Mediated Rescue of Endothelial Nitric Oxide Synthase and Abrogation of Trx2 Autophagy
Source: PubMed Central journal article supplement (PMC8288485; doi:10.1161/atvbaha.121.315957), 2021-05-27
Supplement: atv-41-2293-s001.pdf [file atv-41-2293-s001.pdf]

## SUPPLEMENTAL MATERIALS

Nrg1 $\beta$  released in RIPC improves myocardial perfusion and decreases I/R injury via ErbB2-mediated rescue of eNOS and abrogation of Trx2 autophagy

Running Title: Nrg1 $\beta$  protects MI via rescue of Trx2 degradation

Venkatesh Kundumani-Sridharan<sup>1</sup>, Jaganathan Subramani<sup>1</sup>, Cade Owens<sup>1</sup>, and Kumuda C. Das<sup>1\*</sup>

<sup>\*1</sup>Department of Internal Medicine, Texas Tech University Health Sciences Center, 3601 4<sup>th</sup> Street, Lubbock TX79430.

\*Address for Correspondence:  
Kumuda C. Das, Ph.D  
Department of Internal Medicine  
Texas Tech University Health Sciences Center  
3601 4<sup>th</sup> Street, MS6598  
Lubbock, TX 79424  
Phone: (806) 743-6747  
E-mail: kumuda.das@ttuhsc.edu

## Major Resources Table

In order to allow validation and replication of experiments, all essential research materials listed in the Methods should be included in the Major Resources Table below. Authors are encouraged to use public repositories for protocols, data, code, and other materials and provide persistent identifiers and/or links to repositories when available. Authors may add or delete rows as needed.

### Animals (in vivo studies)

| Species                     | Vendor or Source         | Background Strain | Sex  | Persistent ID / URL                                                                                                                                                     |
|-----------------------------|--------------------------|-------------------|------|-------------------------------------------------------------------------------------------------------------------------------------------------------------------------|
| Mouse - <i>Mus musculus</i> | Charles River Laboratory | C57BL/6NCrl       | Male | <a href="https://www.criver.com/products-services/find-model/c57bl6-mouse?region=3611">https://www.criver.com/products-services/find-model/c57bl6-mouse?region=3611</a> |

### Genetically Modified Animals

|                 | Species | Vendor or Source                                                      | Background Strain            | Other Information                                                           | Persistent ID / URL |
|-----------------|---------|-----------------------------------------------------------------------|------------------------------|-----------------------------------------------------------------------------|---------------------|
| Parent – Male   | Mouse   | European Mouse Mutant Achieve                                         | C57BL/6<br>Substrain unknown | ErbB2 fl/fl (Strain was generated from embryos in Charles River Laboratory) | EMMA ID: EM:08023   |
| Parent - Female | Mouse   | Charles River Laboratory                                              | C57BL/6NCrl                  |                                                                             |                     |
| Parent – Male   | Mouse   | Dr. M. Luisa Iruela-Arispe, University of California, Los Angeles, CA | C57BL/6J                     | CIVE23 (C57BL/6J, Inducible, VE-cadherin Cre-recombinase, line#23           | VE Cad CreERT2      |
| Parent - Female | Mouse   | Dr. M. Luisa Iruela-Arispe, University of California, Los Angeles, CA | C57BL/6J                     | CIVE23 (C57BL/6J, Inducible, VE-cadherin Cre-recombinase, line#23           | VE Cad CreERT2      |

### Antibodies

| Target antigen | Vendor or Source | Catalog # | Working concentration | Lot # (preferred but not required) | Persistent ID / URL |
|----------------|------------------|-----------|-----------------------|------------------------------------|---------------------|
| Nrg1 antibody  | R & D Systems    | AF-396-NA | Neutralizing ab       |                                    |                     |
| eNOS antibody  | BD Biosciences   | 610296    | 1:2000 (WB)           | 7236996                            |                     |

|                                 |                           |           |                                        |  |  |
|---------------------------------|---------------------------|-----------|----------------------------------------|--|--|
| Nrg1 antibody                   | Cell Signaling Technology | 2573      | 1:1000 (WB to detect full length Nrg1) |  |  |
| ErbB2 antibody                  | Cell Signaling Technology | 4290      | 1:1000 (WB)                            |  |  |
| Phospho-eNOS (Ser1177) antibody | Cell Signaling Technology | 9571      | 1:1000 (WB)                            |  |  |
| Phospho-Src (Tyr416) antibody   | Cell Signaling Technology | 2101      | 1:1000 (WB)                            |  |  |
| Ambra1 antibody                 | Cell Signaling Technology | 24907     | 1:1000 (WB)                            |  |  |
| BCLN1 antibody                  | Cell Signaling Technology | 3495      | 1:1000 (WB)                            |  |  |
| Nrg1 antibody                   | Santa Cruz Biotechnology  | SC-28916  | 1:250 (IF)                             |  |  |
| ErbB4 antibody                  | Santa Cruz Biotechnology  | SC-283    | 1:1000 (WB)                            |  |  |
| VE-cadherin antibody            | Santa Cruz Biotechnology  | SC-6458   | 1:1000 (WB)                            |  |  |
| Trx2 antibody                   | Santa Cruz Biotechnology  | SC-50336  | 1:1000 (WB)                            |  |  |
| Heregulin antibody              | Pierce Biotechnology      | RB-276-P0 | 1:2000 (WB)                            |  |  |
| ErbB4 antibody                  | Pierce Biotechnology      | MA5-13016 | Neutralizing ab                        |  |  |
| ErbB4 antibody                  | Pierce Biotechnology      | MA1-861   | 1:200 (PLA)                            |  |  |
| Src antibody                    | Millipore                 | 05-184    | 1:2000 (WB)                            |  |  |
| Phospho-Tyr antibody            | Millipore                 | 05-321    | 1:200 (IP),<br>1:2500 (WB)             |  |  |
| CD31 antibody                   | Abcam                     | ab9498    | 1:1000 (WB)<br>1:200 (IF)              |  |  |
| ATG5 antibody                   | Abcam                     | ab108327  | 1:1000 (WB)                            |  |  |

|                                    |                                                       |              |                           |           |  |
|------------------------------------|-------------------------------------------------------|--------------|---------------------------|-----------|--|
|                                    |                                                       |              | 1:250 (IF)                |           |  |
| Tom20 antibody                     | Abcam                                                 | ab56783      | 1:2000 (WB)               |           |  |
| Her2 antibody (trastuzumab)        | Absolute Antibody Ltd                                 | Ab00103-10.0 | Neutralizing ab           |           |  |
| Phospho-eNOS (Tyr 83) antibody     | Dr. Richard C. Venema, Medical College of Georgia, GA |              | 1:500 (WB)<br>1:100 (IF)  |           |  |
| Alpha-actinin antibody             | Sigma                                                 | AA7732       | 1:5000 (WB)<br>1:500 (IF) |           |  |
| GAPDH-Peroxidase antibody          | Sigma                                                 | G9295        | 1:30,000 (WB)             | 112M4761V |  |
| $\beta$ -actin-Peroxidase antibody | Sigma                                                 | A3854        | 1:30,000 (WB)             | 043M4825V |  |

#### DNA/cDNA Clones

| Clone Name   | Sequence                                                                                                                                          | Source / Repository | Persistent ID / URL                                                                          |
|--------------|---------------------------------------------------------------------------------------------------------------------------------------------------|---------------------|----------------------------------------------------------------------------------------------|
| pcDNA3       | <a href="https://tools.thermofisher.com/content/sfs/vectors/pcdna3_seq.txt">https://tools.thermofisher.com/content/sfs/vectors/pcdna3_seq.txt</a> | Invitrogen Corp     | Cat. No. V79020                                                                              |
| pcDNA3-ErbB2 | <a href="http://www.addgene.org/16257/sequences/">http://www.addgene.org/16257/sequences/</a>                                                     | Addgene Plasmid     | Cat. No. 16257,<br><a href="http://www.addgene.org/16257/">http://www.addgene.org/16257/</a> |

#### Cultured Cells

| Name                                          | Vendor or Source        | Sex (F, M, or unknown) | Persistent ID / URL |
|-----------------------------------------------|-------------------------|------------------------|---------------------|
| Human coronary artery endothelial cells       | Lonza Walkersville, Inc | Male                   | Cat. NO. CC-2585    |
| Human Cardiac Microvascular Endothelial Cells | Lonza Walkersville, Inc | Male                   | Cat. No. CC-7030    |

Supplementary Figures:

Fig S1

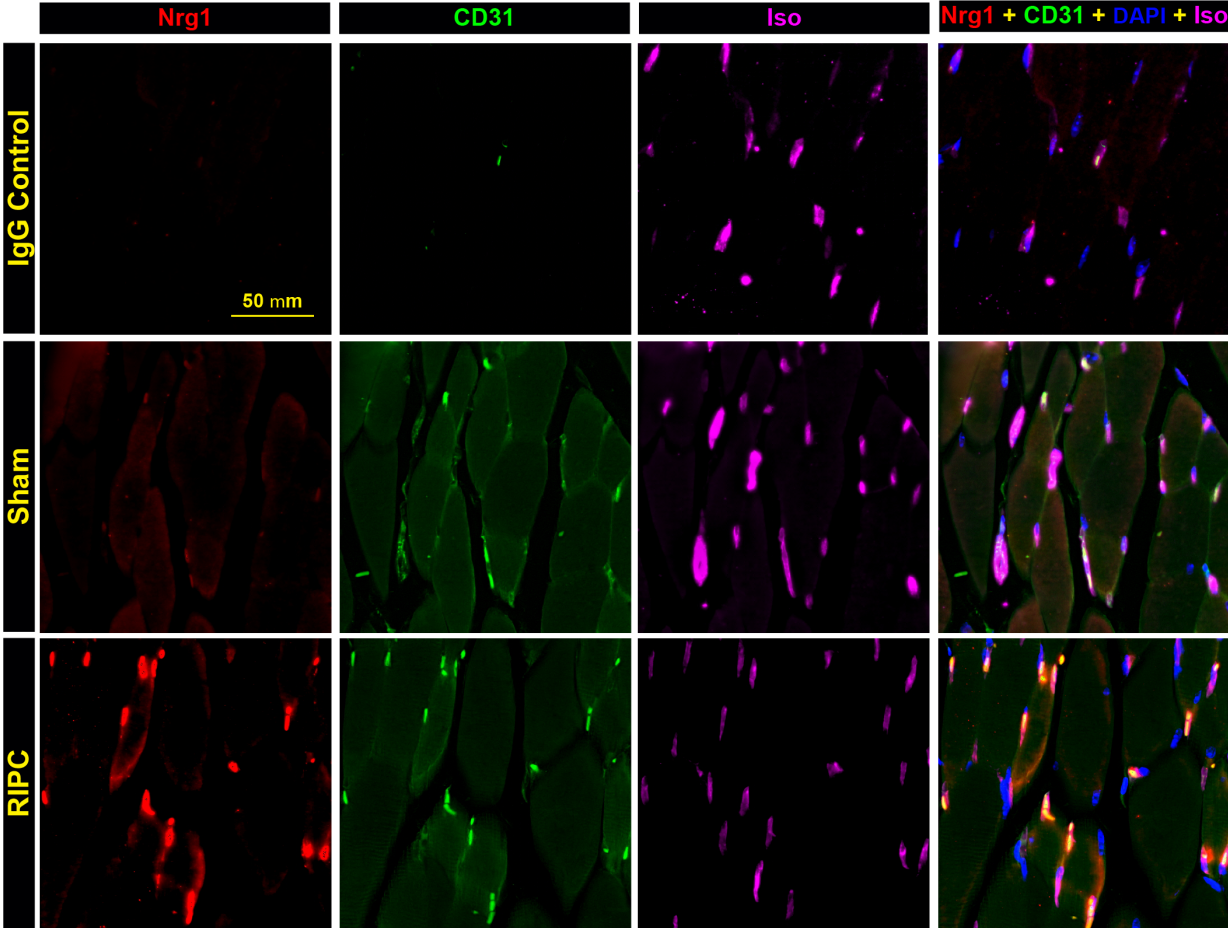

**Fig S1.** Magnified view of Fig 1B including separate channels and IgG control. We used IgG control for both Nrg1 and CD31 antibodies (rabbit and mouse)

**Fig. S2**

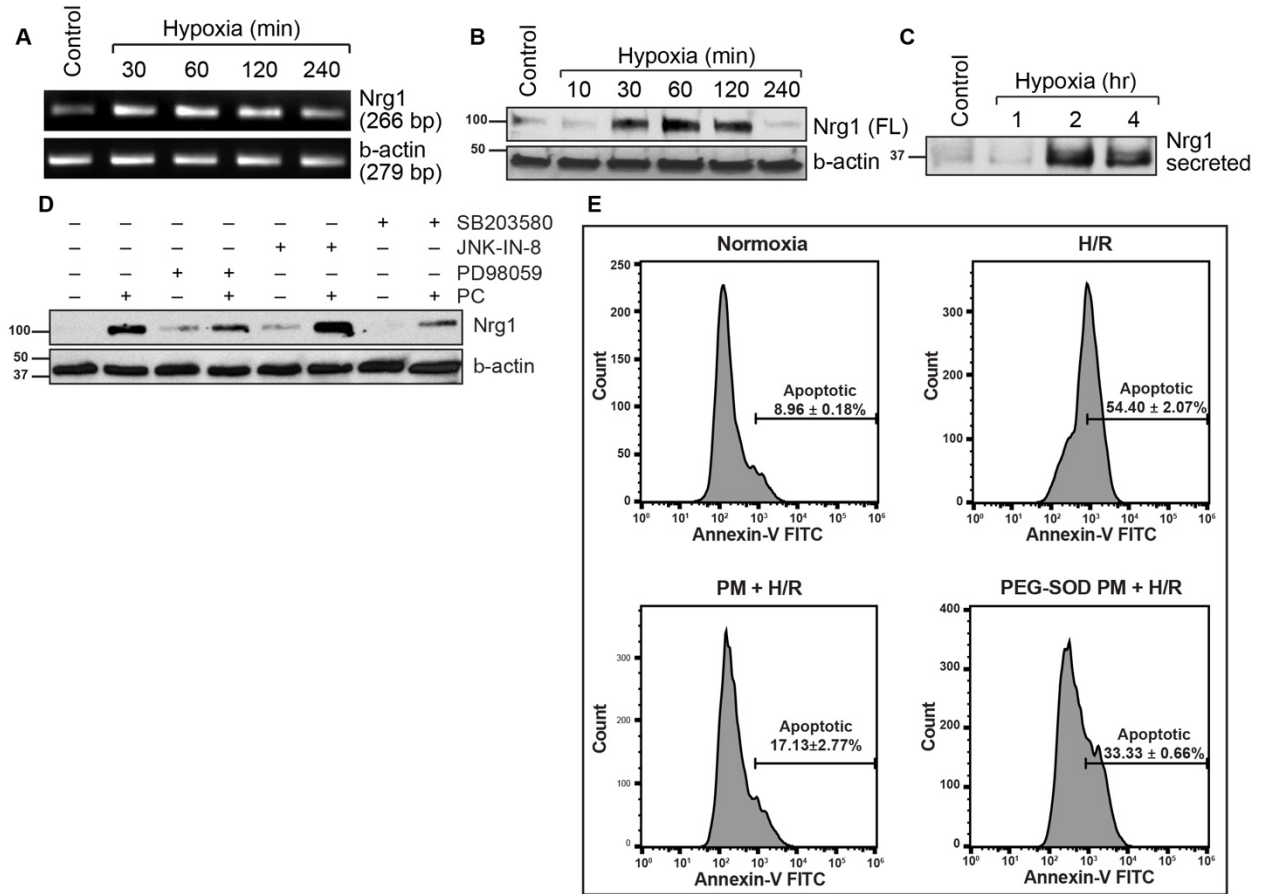

**Fig. S2. Short duration-hypoxia induces Nrg1 expression and its release by microvascular endothelial cells.** (A) HMVEC were exposed to hypoxia for the indicated period followed by 30 minutes of reoxygenation and RNA isolated. RT-PCR was performed to determine the expression level of Nrg1 $\beta$  and  $\beta$ -actin. (B-C) HMVEC were exposed to H/R as described in panel (a), and at the end of treatment, cell lysates were prepared, and the medium was collected. Nrg1 expression (B) and release level (C) were determined in cell lysates and medium, respectively, by Western blotting. (D) HMVEC were pretreated with PD98059, JNK-IN-8, or SB203580 and then preconditioned (1 hour hypoxia/30 minutes reoxygenation). At the end of the preconditioning, cell lysates were prepared, and Nrg1 expression levels were analyzed in cell lysates by Western blotting. (E) HMVECs were incubated with or without PEG-SOD for 6 hours and subjected to PC. PM was collected. HCAECs were treated with or without PM and exposed to H/R. The HCAECs undergoing apoptosis were labeled with annexin V-FITC conjugate, and the percentage of apoptotic cells was quantitated by FACS analysis using Attune NxT Flow Cytometer.

Fig S3

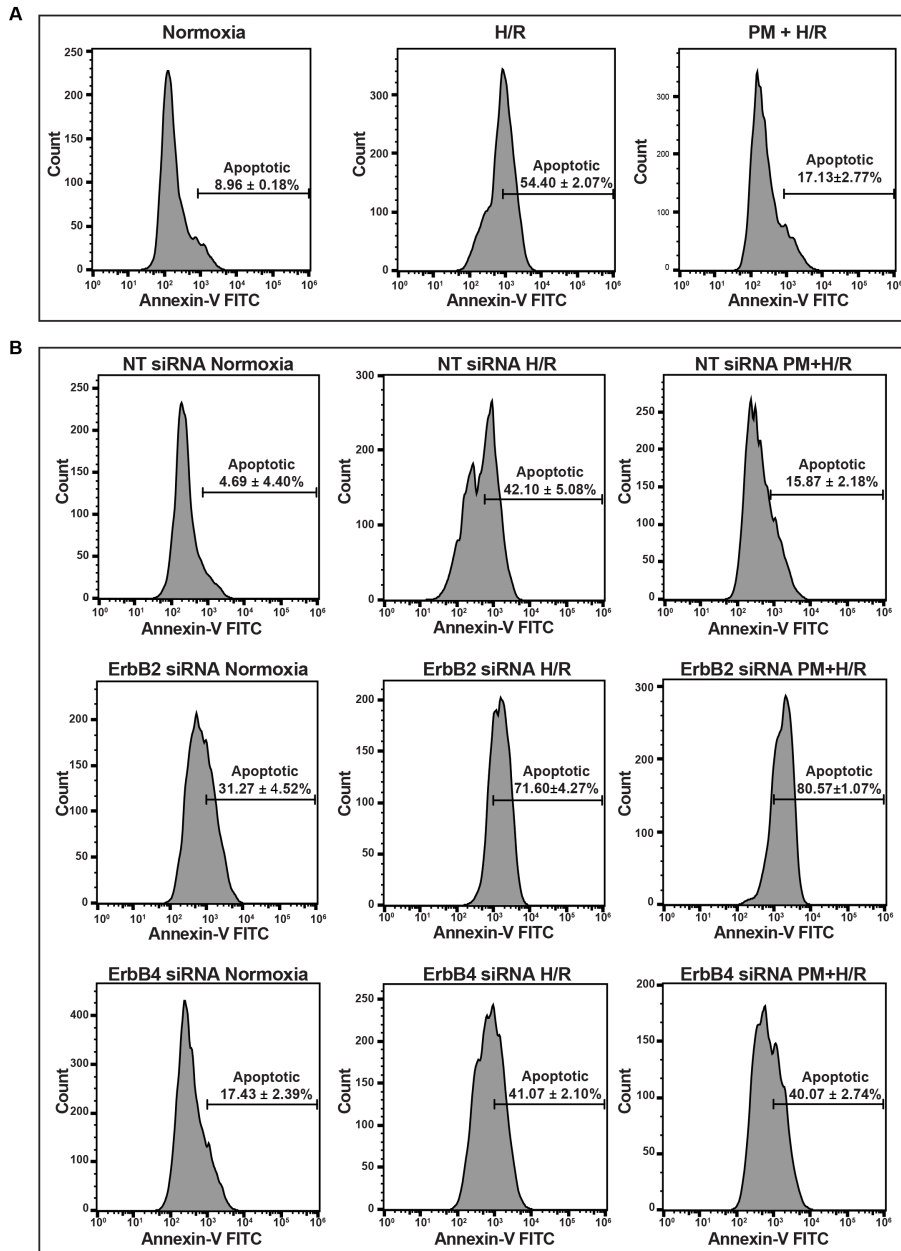

**Fig. S3. Loss of ErbB2 negates RIP3-mediated protection of endothelial cell from apoptosis.**

(A) HCAECs were pretreated with or without PM and exposed to H/R. At the end of treatment, cells undergoing apoptosis were labeled with annexin V-FITC conjugate, and the percentage of apoptotic cells was quantitated by FACS analysis using Attune NxT Flow Cytometer. (B) HCAECs were transfected with NT or ErbB4 or ErbB4 siRNA (100 nM), and after recovery from

transfection, they were treated with or without PM and exposed to H/R. Cells apoptosis was determined as in (A).

**Fig S4**

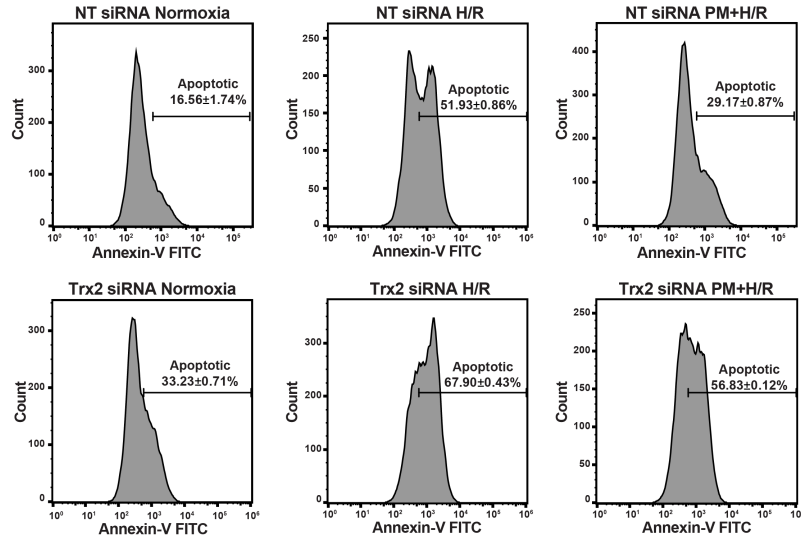

**Fig. S4. Trx2 depletion abrogates RIPC-induced protection of HCAECs from apoptosis.** HCAECs were transfected with NT or Trx2 siRNA (100 nM), and after recovery from transfection, they were treated with or without PM and exposed to H/R. Apoptotic cells were labeled with annexin V-FITC conjugate, and the percentage of apoptotic cells was quantified. (C) HCAEC were transfected with ErbB2 siRNA, treated with PM for 1 hr., and cell lysates were prepared and analyzed for Src activation.



**Fig. S5**

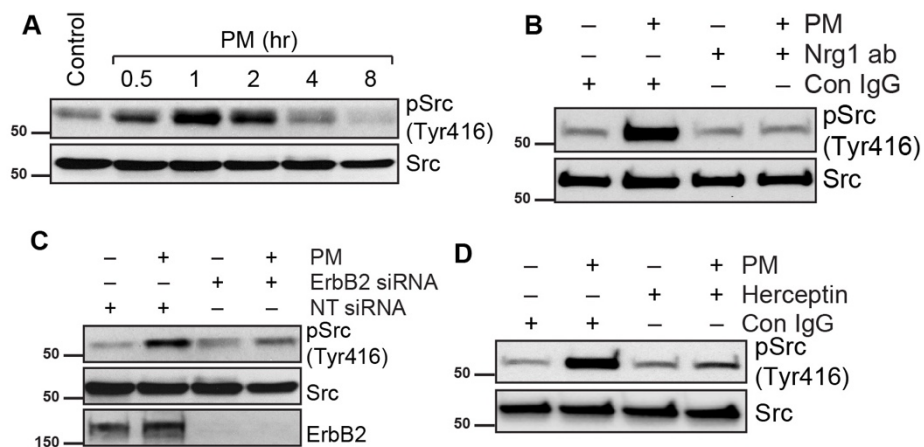

**Fig. S5. PM-induced Src activation is mediated by Nrg1 and ErbB2.** (A) HCAECs were treated with PM for indicated periods, lysed, and an equal amount of protein from cell lysates were analyzed by Western blotting for Src activation by using anti-phospho Src (Tyr416) antibody. (B) HCAECs were incubated with PM or Nrg1 neutralized PM for 1 hr., cell lysates were collected and analyzed for Src activation as described in panel (A). (D) HCAECs were pretreated with Herceptin and incubated with PM for 1 hr., and cell lysates were prepared. Cell lysates were analyzed for Src activation by Western blotting using anti-pSrc(Tyr416) antibodies.

**Fig. S6**

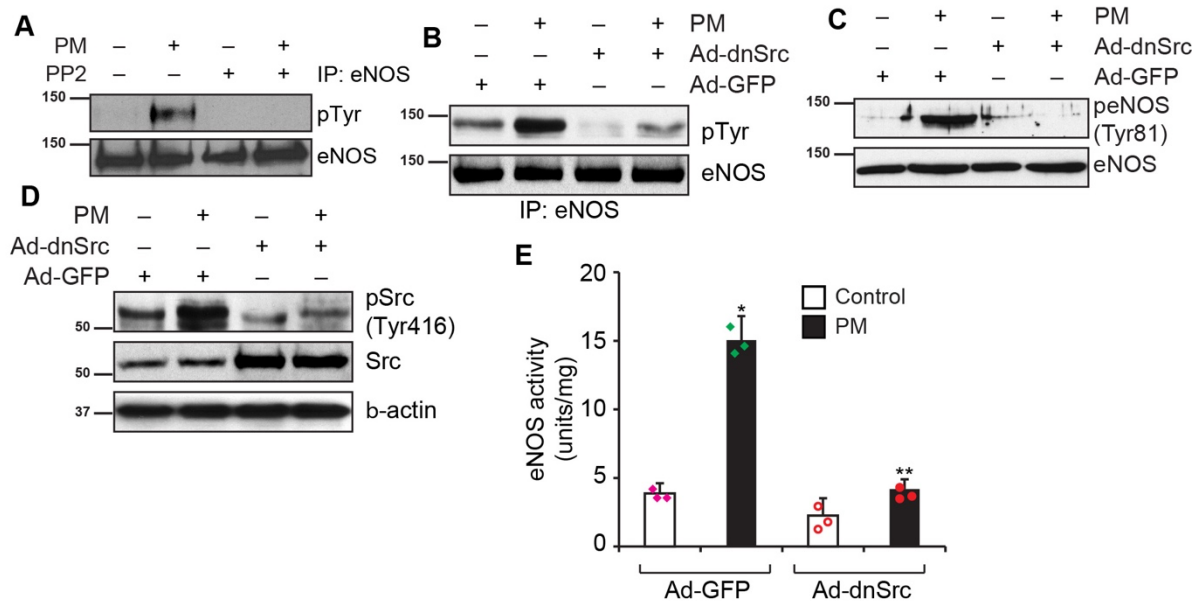

**Fig. S6. Src is essential in RIPC-induced eNOS activation.** (A) HCAECs were treated with PM for 1 hour in the presence and absence of PP2 (5  $\mu$ M), and cell lysates were prepared and analyzed for eNOS tyrosine phosphorylation. (B-E) HCAECs were transduced with Ad-GFP or Ad-dnSrc and treated with PM for 1 hr., and cell lysates were collected and analyzed for eNOS total tyrosine phosphorylation (B) or eNOS-Tyr81 phosphorylation (C) or analyzed for Src levels and its phosphorylation at Tyr 416 (D) or eNOS activity was assayed and plotted as a bar graph (E). \*  $P < 0.01$  versus Ad-GFP control, \*\*  $P < 0.01$  versus Ad-GFP plus PM. One way analysis of variance (ANOVA) was performed using GraphPad -Prism software (version 8)

**Fig S7**

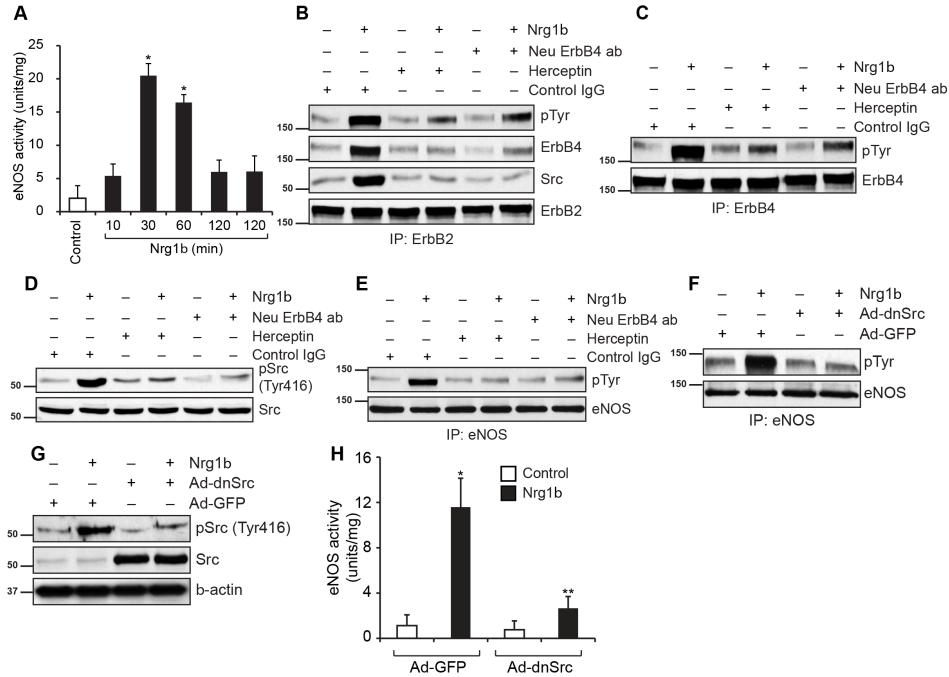

**Fig. S7. Nrg1 $\beta$  activates ErbB2/ErbB4-Src-eNOS signaling axis in HCAEC.** **a**, HCAECs were treated with Nrg1 $\beta$  (10 ng/mL) for the indicated period, lysed, and cell lysates were collected. An equal amount of protein from cell lysates was analyzed for eNOS activity and plotted as a bar graph. **b-e**, HCAEC pretreated with Herceptin or neutralizing anti-ErbB4 antibodies and incubated with Nrg1 $\beta$  (10 ng/mL) for 30 min, and cell lysates were prepared. An equal amount of protein from cell lysates was either immunoprecipitated using anti-ErbB2 antibody, and the immunoprecipitates were analyzed by Western blotting using anti-pTyr, anti-ErbB2, anti-ErbB4 and anti-Src antibodies (**b**) or immunoprecipitated with anti-ErbB4 antibodies and analyzed for ErbB4 tyrosine phosphorylation (**c**) or analyzed for Src activation by Western blotting using anti-phospho-Src (Tyr416) antibodies (**d**) or eNOS tyrosine phosphorylation (**e**). **f-h**, HCAECs were transduced with Ad-GFP or Ad-dnSrc and treated with for Nrg1 $\beta$  (10 ng/mL) for 30 min and cell lysates were collected and analyzed for eNOS tyrosine phosphorylation (**f**) or analyzed by Western blotting using anti-phospho-Src (Tyr416), anti-Src and anti- $\beta$ -actin antibodies (**g**) or assayed for eNOS activity (**h**). \*  $P < 0.01$  versus control Ad-GFP, \*\*  $P < 0.01$  Ad-GFP + Nrg1 $\beta$ . One way analysis of variance (ANOVA) was performed using GraphPad -Prism software (version 8).
